# Supplementary material for: Detection and analysis of ancient segmental duplications in mammalian genomes
Source: HighWire-hosted journal article supplement (doi:10.1101/gr.228718.117), 2018-05-07
Supplement: Supplemental_Fig_S1.pdf [file Supplemental_Fig_S1.pdf]

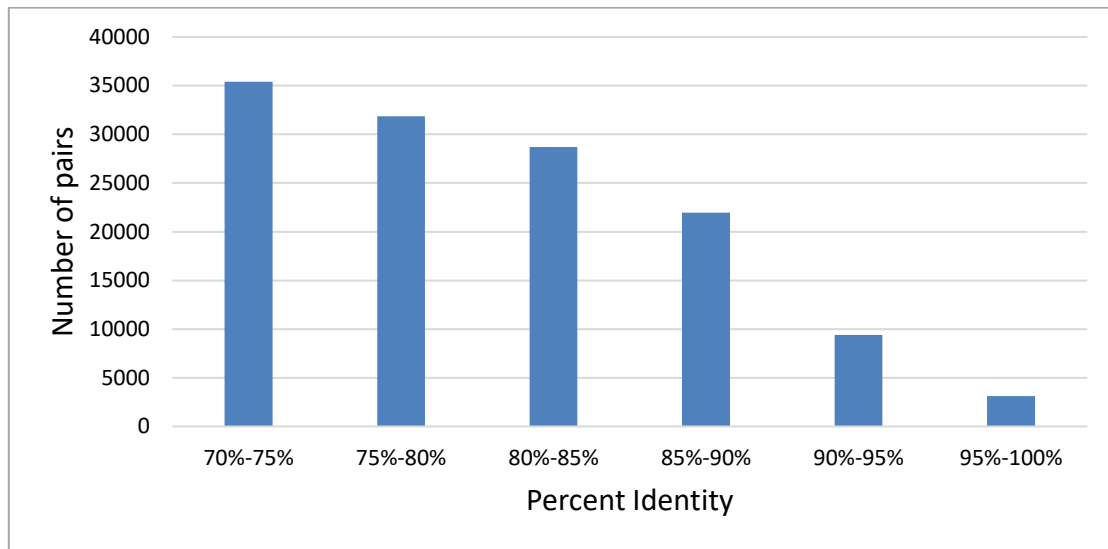

**Figure S1: Number of pairwise alignments (depending on the percent identity) for 130,405 pairwise alignments among putative SDs in the human genome (hg19 version) identified by SDquest.**
