# Supplementary material for: Detection and analysis of ancient segmental duplications in mammalian genomes
Source: HighWire-hosted journal article supplement (doi:10.1101/gr.228718.117), 2018-05-07
Supplement: Supplemental_Table_S1.docx [file Supplemental_Table_S1.docx]

**Supplemental Table S1:**

**Table S1: Numbers and total frequencies of repetitive 25-mers in the compact human genome and known SDs (hg19 version).** Each entry represents the number (or total frequency) of repetitive 25-mers with specified frequency in the compact human genome and in known SDs.

|  | *k*-mer frequency | | | | | | | | | | | | |
| --- | --- | --- | --- | --- | --- | --- | --- | --- | --- | --- | --- | --- | --- |
| 2 | 3 | 4 | 5 | 6 | 7 | 8 | 9 | 10 | 11-20 | 21-50 | >50 | Total |
| number of  *k*-mers in genome  (1000s) | 13,339 | 2,797 | 1,258 | 633 | 407 | 266 | 161 | 91 | 55 | 172 | 28 | 3 | 19,210 |
| number of  *k*-mers in  known SDs (1000s) | 11,445 | 2,704 | 1,232 | 623 | 401 | 263 | 159 | 89 | 54 | 169 | 28 | 3 | 17,170 |
| total frequency of  *k*-mers in  genome (1000s) | 26,679 | 8,392 | 5,030 | 3,167 | 2,440 | 1,861 | 1,288 | 818 | 552 | 2,371 | 711 | 190 | 53,499 |
| total frequency of  *k*-mers in  known SDs (1000s) | 22,593 | 7,823 | 4,809 | 3,038 | 2,359 | 1,804 | 1,247 | 783 | 524 | 2,254 | 664 | 184 | 48,082 |
