# Supplementary material for: Detection and analysis of ancient segmental duplications in mammalian genomes
Source: HighWire-hosted journal article supplement (doi:10.1101/gr.228718.117), 2018-05-07
Supplement: Supplemental_Table_S2.docx [file Supplemental_Table_S2.docx]

**Supplemental Table S2:**

**Table S2: Distribution of multiplicities and lengths of all elementary SDs in the human genome (hg19 assembly of the human genome).** Each entry in the table represents the number of elementary SDs with specified length and multiplicity.

| Elementary SD  Length | Multiplicity | | | | | | | | | | | | | |
| --- | --- | --- | --- | --- | --- | --- | --- | --- | --- | --- | --- | --- | --- | --- |
| **1** | **2** | **3** | **4** | **5** | **6** | **7** | **8** | **9** | **10** | **11-20** | **21-50** | **>50** | **Total** |
| 0.1-0.2 Kb | 944 | 865 | 660 | 564 | 515 | 356 | 257 | 204 | 219 | 180 | 926 | 641 | 83 | 6414 |
| 0.2-0.3 Kb | 795 | 794 | 798 | 640 | 656 | 491 | 387 | 344 | 311 | 233 | 1393 | 726 | 69 | 7637 |
| 0.3-0.4 Kb | 745 | 680 | 589 | 614 | 557 | 401 | 370 | 243 | 266 | 255 | 1647 | 905 | 169 | 7441 |
| 0.4-0.5 Kb | 601 | 605 | 541 | 450 | 397 | 363 | 262 | 262 | 216 | 151 | 1230 | 856 | 170 | 6104 |
| 0.5-0.6 Kb | 863 | 663 | 540 | 435 | 375 | 308 | 277 | 186 | 215 | 176 | 977 | 737 | 157 | 5909 |
| 0.6-0.7 Kb | 920 | 531 | 395 | 369 | 302 | 293 | 220 | 173 | 162 | 184 | 1056 | 724 | 151 | 5480 |
| 0.7-0.8 Kb | 825 | 496 | 378 | 285 | 289 | 212 | 182 | 134 | 131 | 122 | 762 | 487 | 441 | 4744 |
| 0.8-0.9 Kb | 720 | 403 | 267 | 225 | 171 | 147 | 111 | 126 | 84 | 115 | 613 | 422 | 46 | 3450 |
| 0.9-1 Kb | 665 | 355 | 291 | 188 | 173 | 122 | 126 | 76 | 48 | 44 | 411 | 277 | 65 | 2841 |
| 1-2 Kb | 3755 | 1683 | 1051 | 851 | 622 | 547 | 482 | 328 | 327 | 296 | 1460 | 1233 | 264 | 12899 |
| 2-5 Kb | 2256 | 894 | 526 | 432 | 326 | 319 | 265 | 121 | 90 | 81 | 361 | 259 | 0 | 5930 |
| >5 Kb | 1190 | 436 | 240 | 177 | 123 | 122 | 137 | 59 | 36 | 13 | 40 | 17 | 0 | 2590 |
| Total | 14279 | 8405 | 6276 | 5230 | 4506 | 3681 | 3076 | 2256 | 2105 | 1850 | 10876 | 7284 | 1615 | 71439 |
