# Supplementary material for: Detection and analysis of ancient segmental duplications in mammalian genomes
Source: HighWire-hosted journal article supplement (doi:10.1101/gr.228718.117), 2018-05-07
Supplement: Supplemental_Table_S3.docx [file Supplemental_Table_S3.docx]

**Supplemental Table S3:**

**Table S3: Distribution of multiplicities and complexities of mosaic SDs identified by SDquest in the “hg19” assembly of the human genome.** Each entry in the table represents the number of mosaic SDs with specified complexity and multiplicity in the human genome. 16,231-15,549= 682 mosaic SDs missed in the table because they contain so many endpoints of pairwise alignments that they become fragmented into small segments that do not exceed 100 bp in length and do not pass our threshold for the minimal length of elementary SD.

| Complexity | Multiplicity | | | | | | | | | | | | | |
| --- | --- | --- | --- | --- | --- | --- | --- | --- | --- | --- | --- | --- | --- | --- |
| **1** | **2** | **3** | **4** | **5** | **6** | **7** | **8** | **9** | **10** | **11-20** | **21-50** | **>50** | **Total** |
| 1 | 6156 | 610 | 236 | 164 | 93 | 74 | 71 | 42 | 29 | 36 | 157 | 353 | 114 | 8135 |
| 2 | 1028 | 313 | 185 | 112 | 85 | 70 | 46 | 28 | 38 | 22 | 224 | 198 | 6 | 2355 |
| 3 | 731 | 267 | 138 | 77 | 79 | 58 | 37 | 24 | 22 | 17 | 118 | 72 | 7 | 1647 |
| 4 | 240 | 199 | 92 | 61 | 63 | 26 | 21 | 17 | 30 | 23 | 83 | 20 | 53 | 928 |
| 5 | 146 | 96 | 67 | 54 | 16 | 15 | 25 | 12 | 9 | 5 | 48 | 11 | 5 | 509 |
| 6 | 57 | 72 | 45 | 34 | 16 | 11 | 10 | 5 | 2 | 19 | 20 | 7 | 0 | 298 |
| 7 | 44 | 60 | 25 | 25 | 16 | 12 | 14 | 9 | 3 | 4 | 24 | 8 | 4 | 248 |
| 8 | 19 | 31 | 35 | 14 | 13 | 8 | 6 | 7 | 2 | 3 | 18 | 3 | 3 | 162 |
| 9 | 28 | 21 | 24 | 16 | 5 | 8 | 11 | 3 | 1 | 5 | 4 | 6 | 1 | 133 |
| 10 | 7 | 22 | 18 | 8 | 6 | 2 | 5 | 1 | 1 | 3 | 7 | 5 | 1 | 86 |
| 11-20 | 31 | 66 | 79 | 61 | 37 | 40 | 24 | 21 | 11 | 2 | 87 | 17 | 1 | 477 |
| 21-50 | 1 | 19 | 34 | 35 | 31 | 34 | 21 | 23 | 13 | 14 | 92 | 37 | 2 | 356 |
| >50 | 0 | 1 | 2 | 13 | 11 | 6 | 10 | 17 | 19 | 10 | 94 | 28 | 4 | 215 |
| Total | 8488 | 1777 | 980 | 674 | 471 | 364 | 301 | 209 | 180 | 163 | 976 | 765 | 201 | 15549 |
