# Supplementary material for: Detection and analysis of ancient segmental duplications in mammalian genomes
Source: HighWire-hosted journal article supplement (doi:10.1101/gr.228718.117), 2018-05-07
Supplement: Supplemental_Table_S4.docx [file Supplemental_Table_S4.docx]

**Supplemental Table S4:**

**Table S4: Distribution of multiplicities and lengths of all SD-blocks in the human genome (hg19 assembly of the human genome).** Each entry in the table represents the number of SD-blocks with specified length and multiplicity.

| SD-block  length | Multiplicity | | | | | | | | | | | | |
| --- | --- | --- | --- | --- | --- | --- | --- | --- | --- | --- | --- | --- | --- |
| **2** | **3** | **4** | **5** | **6** | **7** | **8** | **9** | **10** | **11-20** | **21-50** | **>50** | **Total** |
| 0.1-0.2 Kb | 314 | 202 | 118 | 91 | 86 | 38 | 19 | 22 | 24 | 82 | 32 | 1 | 1029 |
| 0.2-0.3 Kb | 290 | 171 | 153 | 102 | 92 | 67 | 53 | 36 | 36 | 121 | 45 | 1 | 1167 |
| 0.3-0.4 Kb | 262 | 161 | 111 | 97 | 69 | 44 | 34 | 42 | 30 | 154 | 57 | 3 | 1064 |
| 0.4-0.5 Kb | 226 | 130 | 108 | 79 | 46 | 47 | 30 | 35 | 18 | 96 | 47 | 2 | 864 |
| 0.5-0.6 Kb | 369 | 177 | 125 | 69 | 53 | 44 | 30 | 19 | 22 | 80 | 40 | 4 | 1032 |
| 0.6-0.7 Kb | 437 | 147 | 76 | 64 | 53 | 31 | 31 | 12 | 16 | 78 | 35 | 2 | 982 |
| 0.7-0.8 Kb | 381 | 138 | 76 | 49 | 44 | 38 | 25 | 14 | 13 | 56 | 31 | 3 | 868 |
| 0.8-0.9 Kb | 364 | 103 | 65 | 43 | 21 | 14 | 14 | 12 | 8 | 49 | 20 | 3 | 716 |
| 0.9-1 Kb | 305 | 105 | 63 | 34 | 29 | 19 | 15 | 14 | 3 | 35 | 14 | 1 | 637 |
| 1-2 Kb | 1904 | 461 | 261 | 171 | 114 | 70 | 60 | 29 | 34 | 107 | 61 | 4 | 3276 |
| 2-5 Kb | 1126 | 270 | 130 | 96 | 55 | 44 | 33 | 10 | 3 | 28 | 12 | 0 | 1807 |
| >5 Kb | 610 | 134 | 57 | 34 | 25 | 17 | 14 | 5 | 4 | 2 | 0 | 0 | 902 |
| Total | 6588 | 2199 | 1343 | 929 | 687 | 473 | 358 | 250 | 211 | 888 | 394 | 24 | 14344 |
