# Supplementary material for: Detection and analysis of ancient segmental duplications in mammalian genomes
Source: HighWire-hosted journal article supplement (doi:10.1101/gr.228718.117), 2018-05-07
Supplement: Supplemental_Table_S5.docx [file Supplemental_Table_S5.docx]

**Supplemental Table S5:**

**Table S5: Distribution of multiplicities and lengths of all SD-units in the human genome (hg19 assembly of the human genome).** Each entry in the table represents the number of SD-units with specified length and multiplicity.

| SD-unit  length | Multiplicity | | | | | | | | | | | | |
| --- | --- | --- | --- | --- | --- | --- | --- | --- | --- | --- | --- | --- | --- |
| **2** | **3** | **4** | **5** | **6** | **7** | **8** | **9** | **10** | **11-20** | **21-50** | **>50** | **Total** |
| 0.1-0.2 Kb | 121 | 51 | 23 | 26 | 17 | 10 | 5 | 12 | 8 | 25 | 8 | 0 | 306 |
| 0.2-0.3 Kb | 102 | 40 | 53 | 28 | 30 | 21 | 20 | 13 | 12 | 46 | 12 | 0 | 377 |
| 0.3-0.4 Kb | 87 | 40 | 26 | 31 | 22 | 14 | 12 | 15 | 6 | 58 | 26 | 1 | 338 |
| 0.4-0.5 Kb | 80 | 36 | 25 | 22 | 13 | 18 | 11 | 12 | 11 | 48 | 16 | 1 | 293 |
| 0.5-0.6 Kb | 229 | 54 | 34 | 30 | 18 | 19 | 10 | 6 | 9 | 45 | 25 | 3 | 482 |
| 0.6-0.7 Kb | 302 | 60 | 42 | 22 | 27 | 9 | 14 | 7 | 9 | 48 | 24 | 2 | 566 |
| 0.7-0.8 Kb | 270 | 41 | 28 | 21 | 28 | 16 | 13 | 8 | 8 | 43 | 18 | 1 | 495 |
| 0.8-0.9 Kb | 267 | 38 | 21 | 30 | 19 | 13 | 13 | 9 | 2 | 36 | 16 | 4 | 468 |
| 0.9-1 Kb | 216 | 48 | 21 | 17 | 14 | 17 | 12 | 13 | 5 | 29 | 12 | 1 | 405 |
| 1-2 Kb | 1319 | 298 | 197 | 127 | 93 | 58 | 49 | 41 | 32 | 128 | 74 | 4 | 2420 |
| 2-5 Kb | 826 | 276 | 183 | 115 | 76 | 52 | 34 | 18 | 12 | 57 | 17 | 1 | 1667 |
| >5 Kb | 522 | 221 | 110 | 71 | 41 | 30 | 28 | 16 | 7 | 13 | 2 | 0 | 1061 |
| Total | 4341 | 1203 | 763 | 540 | 398 | 277 | 221 | 170 | 121 | 576 | 250 | 18 | 8878 |
