# Supplementary material for: Detection and analysis of ancient segmental duplications in mammalian genomes
Source: HighWire-hosted journal article supplement (doi:10.1101/gr.228718.117), 2018-05-07
Supplement: Supplemental_Table_S7.docx [file Supplemental_Table_S7.docx]

**Supplemental Table S7**

**Table S7: The total length of SDs shared between human (**GRCh38 **version) and gorilla genome (gorGor5 version).** Column “Ancestral human-gorilla SDs in human genome” and “Ancestral human-gorilla SDs in gorilla genome” respectively represent ancestral SDs shared between human and gorilla genomes.

| Percent identity | **Ancestral human-gorilla SDs in human genome (compact genome)** | **Ancestral human-gorilla SDs in gorilla genome (compact genome)** |
| --- | --- | --- |
| More than 90% | 101.9 (57.7) Mb | 88 (50.9) Mb |
| From 80% to 90% | 23.5 (10) Mb | 20.7 (9.2) Mb |
| From 70% to 80% | 4.3 (1.9) Mb | 3.1 (1.2) Mb |
| Total | 129.7 (69.6) Mb | 111.8 (61.3) Mb |
