# Supplementary material for: Detection and analysis of ancient segmental duplications in mammalian genomes
Source: HighWire-hosted journal article supplement (doi:10.1101/gr.228718.117), 2018-05-07
Supplement: Supplemental_Table_S8.docx [file Supplemental_Table_S8.docx]

**Supplemental Table S8**

**Table S8: The total length of SDs shared between human (**GRCh38 **version) and mouse genome (mm10 version).** Column “Ancestral human-mouse SDs in human genome” and “Ancestral human-mouse SDs in mouse genome” respectively represent ancestral SDs shared between human and mouse genomes.

| Percent identity | **Ancestral human-mouse SDs in human genome (compact genome)** | **Ancestral human-mouse SDs in mouse genome (compact genome)** |
| --- | --- | --- |
| More than 90% | 0.06 (0.059) Mb | 0.13 (0.12) Mb |
| From 80% to 90% | 1.84 (1.54) Mb | 1.99 (1.64) Mb |
| From 70% to 80% | 3.14 (2.42) Mb | 3.24 (2.58) Mb |
| Total | 5.04 (4.02) Mb | 5.36 (4.34) Mb |
