# Supplementary material for: Detection and analysis of ancient segmental duplications in mammalian genomes
Source: HighWire-hosted journal article supplement (doi:10.1101/gr.228718.117), 2018-05-07
Supplement: Supplemental_Table_S9.docx [file Supplemental_Table_S9.docx]

**Supplemental Table S9**

**Table S9: The total length of SDs shared between gorilla (gorGor5 version) and mouse genome (mm10 version).** Column “Ancestral gorilla-mouse SDs in gorilla genome” and “Ancestral gorilla-mouse SDs in mouse genome” respectively represent ancestral SDs shared between gorilla and mouse genomes.

| Percent identity | **Ancestral gorilla-mouse SDs in gorilla genome (compact genome)** | **Ancestral gorilla-mouse SDs in mouse genome (compact genome)** |
| --- | --- | --- |
| More than 90% | 0.059 (0.058) Mb | 0.11 (0.1) Mb |
| From 80% to 90% | 1.8 (1.47) Mb | 1.99 (1.65) Mb |
| From 70% to 80% | 3.07 (2.34) Mb | 3.4 (2.55) Mb |
| Total | 4.93 (3.87) Mb | 5.5 (4.3) Mb |
