# Supplementary material for: Detection and analysis of ancient segmental duplications in mammalian genomes
Source: HighWire-hosted journal article supplement (doi:10.1101/gr.228718.117), 2018-05-07
Supplement: Supplemental_Table_S10.docx [file Supplemental_Table_S10.docx]

**Supplemental Table S10:**

**Table S10: Distribution of multiplicities and complexities of mosaic SDs in “mm8” assembly of the mouse genome.** Each entry in the table represents the number of mosaic SDs with complexity and multiplicity in the mouse genome.22,347-17,730=4,617 mosaic SDs missed in the table because they contain so many endpoints of pairwise alignments that they become fragmented into small segments that do not exceed 100 bp in length and do not pass our threshold for the minimal length of elementary SD.

| Complexity | Multiplicity | | | | | | | | | | | | | |
| --- | --- | --- | --- | --- | --- | --- | --- | --- | --- | --- | --- | --- | --- | --- |
| **1** | **2** | **3** | **4** | **5** | **6** | **7** | **8** | **9** | **10** | **11-20** | **21-50** | **>50** | **Total** |
| 1 | 6722 | 725 | 311 | 172 | 151 | 96 | 80 | 65 | 58 | 48 | 380 | 313 | 9 | 9130 |
| 2 | 1224 | 413 | 215 | 147 | 90 | 68 | 60 | 59 | 40 | 27 | 223 | 113 | 75 | 2754 |
| 3 | 623 | 306 | 168 | 95 | 75 | 54 | 56 | 41 | 36 | 32 | 140 | 55 | 4 | 1685 |
| 4 | 215 | 223 | 97 | 73 | 52 | 27 | 20 | 34 | 24 | 28 | 92 | 28 | 1 | 914 |
| 5 | 125 | 138 | 76 | 45 | 29 | 32 | 24 | 20 | 21 | 22 | 70 | 10 | 2 | 614 |
| 6 | 66 | 84 | 48 | 45 | 21 | 22 | 17 | 12 | 7 | 12 | 44 | 8 | 1 | 387 |
| 7 | 58 | 79 | 42 | 24 | 15 | 14 | 15 | 8 | 6 | 3 | 25 | 6 | 0 | 295 |
| 8 | 36 | 56 | 29 | 24 | 24 | 12 | 10 | 6 | 9 | 6 | 18 | 6 | 2 | 238 |
| 9 | 24 | 36 | 32 | 19 | 14 | 5 | 14 | 7 | 3 | 5 | 16 | 14 | 2 | 191 |
| 10 | 6 | 32 | 20 | 14 | 10 | 6 | 7 | 5 | 4 | 4 | 14 | 5 | 2 | 129 |
| 11-20 | 31 | 120 | 121 | 101 | 49 | 50 | 37 | 32 | 35 | 32 | 85 | 37 | 6 | 736 |
| 21-50 | 3 | 23 | 41 | 60 | 50 | 56 | 36 | 30 | 23 | 15 | 53 | 34 | 9 | 433 |
| >50 | 0 | 0 | 10 | 10 | 15 | 10 | 10 | 13 | 7 | 2 | 57 | 51 | 39 | 224 |
| Total | 9133 | 2235 | 1210 | 829 | 595 | 452 | 386 | 332 | 273 | 236 | 1217 | 680 | 152 | 17730 |
