# Supplementary material for: Detection and analysis of ancient segmental duplications in mammalian genomes
Source: HighWire-hosted journal article supplement (doi:10.1101/gr.228718.117), 2018-05-07
Supplement: Supplemental_Table_S11.docx [file Supplemental_Table_S11.docx]

**Supplemental Table S11:**

**Table S11: Summary of SDs identified by SDquest in human (hg19 version), gorilla (gorGor5 version) and mouse (mm8 version) genome.** “CR” stands for “common repeats”.

|  | Human (hg19) | Gorilla (gorGor5) | Mouse (mm8) |
| --- | --- | --- | --- |
| Genome size (Mb) | 3,095.7 | 3,080.4 | 2,644.1 |
| CR in genome | 1,682.1 (54.3%) | 1,540.7 (50%) | 1,173.2 (44.3%) |
| Mosaic SDs | 187.4 Mb (6.05%) | 173 Mb (5.61%) | 173.5 Mb (6.56%) |
| CR in mosaic SDs | 93.7Mb (50% of SDs) | 86.5 Mb (50% of SDs) | 91.7 Mb (53% of SDs) |
