# Supplementary material for: Detection and analysis of ancient segmental duplications in mammalian genomes
Source: HighWire-hosted journal article supplement (doi:10.1101/gr.228718.117), 2018-05-07
Supplement: Supplemental_Table_S12.docx [file Supplemental_Table_S12.docx]

**Supplemental Table S12:**

**Table S12: Running time and memory requirement of SDquest for identifying SDs in human, gorilla and mouse genome.** Most of the running time of SDquest is spend on the step (5) “Verifying putative SDs” by LASTZ. This table shows the runtime of SDquest by using single CPU. To speed up SDquest, users can run SDquest on multiple CPUs.

|  | LASTZ running time | Total running time | Memory usage |
| --- | --- | --- | --- |
| Human (GRCh38) | 10.5 hours | 17 hours | 25.2 GB |
| Human (hg19) | 9 hours | 15 hours | 24.9 GB |
| Gorilla (gorGor5) | 7 hours | 26 hours | 23.4 GB |
| Mouse (mm10) | 80 hours | 89 hours | 20.7 GB |
| Mouse (mm8) | 17.5 hours | 23 hours | 22.9 GB |
